# Supplementary material
Source: PubMed Central journal article supplement (PMC6583201)
Supplement: jamaneurol-75-1494-s002.pdf [file jamaneurol-75-1494-s002.pdf]

## Supplementary Online Content

Goldstein LB, Lennihan L, Rabadi MJ, et al. Effect of dextroamphetamine on poststroke motor recovery: a randomized clinical trial. *JAMA Neurol*. Published online August 27, 2018. doi:10.1001/jamaneurol.2018.2338

**eFigure.** Stratification of Participants by Stroke Severity and Type

**eTable 1.** Baseline Demographics and Participant Characteristics

**eTable 2.** Mean National Institutes of Health Stroke Scale Score (SEM)

**eTable 3.** Mean Canadian Neurological Scale Score (SEM)

**eTable 4.** Mean Functional Independence Measure Score (SEM)

**eTable 5.** Mean Ambulation Distance (6-Minute Walk Test) (SEM)

**eTable 6.** Mean Ambulation Speed (6-Minute Walk Test) (SEM)

**eTable 7.** Mean Research Arm Test Score (SEM)

**eTable 8.** Mean Mini-Mental State Examination Score (SEM)

**eTable 9.** Mean Beck Depression Index Score (SEM)

**eTable 10.** Mean Stroke Impact Scale Score (SEM)

This supplementary material has been provided by the authors to give readers additional information about their work.

## Amphetamine-Enhanced Stroke Recovery Trial Supplement

**Supplemental Table 1. Baseline Demographics and Participant Characteristics**

| Strata                   | Severe-Cortical |            | Severe-Subcortical |             | Moderate-Cortical |            | Moderate-Subcortical |            | Total       |             | p value* |
|--------------------------|-----------------|------------|--------------------|-------------|-------------------|------------|----------------------|------------|-------------|-------------|----------|
|                          | A<br>(N=8)      | P<br>(N=9) | A<br>(N=12)        | P<br>(N=13) | A<br>(N=6)        | P<br>(N=4) | A<br>(N=6)           | P<br>(N=6) | A<br>(N=32) | P<br>(N=32) |          |
| <b>Characteristics</b>   |                 |            |                    |             |                   |            |                      |            |             |             |          |
| <b>Age</b>               |                 |            |                    |             |                   |            |                      |            |             |             | 0.6869   |
| Median                   | 60.0            | 61.0       | 70.5               | 71.0        | 63.5              | 70.0       | 61.5                 | 57.5       | 67.5        | 65.5        |          |
| Q1, Q3                   | 54.5, 71.0      | 59.0, 73.0 | 66.5, 78.0         | 53.0, 79.0  | 50.0, 73.0        | 64.5, 78.5 | 53.0, 78.0           | 56.0, 65.0 | 57.0, 77.5  | 56.0, 75.0  |          |
| <b>Sex</b>               |                 |            |                    |             |                   |            |                      |            |             |             | 0.4513   |
| Male                     | 6 (75.0%)       | 4 (44.4%)  | 6 (50.0%)          | 7 (53.8%)   | 4 (66.7%)         | 3 (75.0%)  | 3 (50.0%)            | 2 (33.3%)  | 19 (59.4%)  | 16 (50.0%)  |          |
| Female                   | 2 (25.0%)       | 5 (55.6%)  | 6 (50.0%)          | 6 (46.2%)   | 2 (33.3%)         | 1 (25.0%)  | 3 (50.0%)            | 4 (66.7%)  | 13 (40.6%)  | 16 (50.0%)  |          |
| <b>Race</b>              |                 |            |                    |             |                   |            |                      |            |             |             | 0.1061   |
| White                    | 8 (100.0%)      | 8 (88.9%)  | 9 (75.0%)          | 9 (69.2%)   | 5 (83.3%)         | 4 (100.0%) | 4 (66.7%)            | 2 (33.3%)  | 26 (81.3%)  | 23 (71.9%)  |          |
| Black                    | 0 (0.0%)        | 1 (11.1%)  | 0 (0.0%)           | 3 (23.1%)   | 1 (16.7%)         | 0 (0.0%)   | 1 (16.7%)            | 4 (66.7%)  | 2 (6.3%)    | 8 (25.0%)   |          |
| Other                    | 0 (0.0%)        | 0 (0.0%)   | 1 (8.3%)           | 1 (7.7%)    | 0 (0.0%)          | 0 (0.0%)   | 1 (16.7%)            | 0 (0.0%)   | 2 (6.3%)    | 1 (3.1%)    |          |
| Hispanic                 | 0 (0.0%)        | 0 (0.0%)   | 2 (16.7%)          | 0 (0.0%)    | 0 (0.0%)          | 0 (0.0%)   | 0 (0.0%)             | 0 (0.0%)   | 2 (6.3%)    | 0 (0.0%)    |          |
| <b>Lives with</b>        |                 |            |                    |             |                   |            |                      |            |             |             | 0.3989   |
| Spouse                   | 6 (75.0%)       | 4 (44.4%)  | 5 (41.7%)          | 8 (61.5%)   | 4 (66.7%)         | 2 (50.0%)  | 2 (33.3%)            | 2 (33.3%)  | 17 (53.1%)  | 16 (50.0%)  |          |
| Significant Other        | 0 (0.0%)        | 0 (0.0%)   | 0 (0.0%)           | 0 (0.0%)    | 0 (0.0%)          | 0 (0.0%)   | 1 (16.7%)            | 1 (16.7%)  | 1 (3.1%)    | 1 (3.1%)    |          |
| Other Adult              | 1 (12.5%)       | 3 (33.3%)  | 2 (16.7%)          | 2 (15.4%)   | 0 (0.0%)          | 2 (50.0%)  | 1 (16.7%)            | 2 (33.3%)  | 4 (12.5%)   | 9 (28.1%)   |          |
| None of the Above        | 1 (12.5%)       | 2 (22.2%)  | 5 (41.7%)          | 3 (23.1%)   | 2 (33.3%)         | 0 (0.0%)   | 2 (33.3%)            | 1 (16.7%)  | 10 (31.3%)  | 6 (18.8%)   |          |
| <b>Living condition</b>  |                 |            |                    |             |                   |            |                      |            |             |             | 0.8371   |
| House                    | 6 (75.0%)       | 7 (77.8%)  | 8 (66.7%)          | 9 (69.2%)   | 6 (100.0%)        | 3 (75.0%)  | 3 (50.0%)            | 3 (50.0%)  | 23 (71.9%)  | 22 (68.8%)  |          |
| Apartment                | 2 (25.0%)       | 2 (22.2%)  | 3 (25.0%)          | 3 (23.1%)   | 0 (0.0%)          | 1 (25.0%)  | 3 (50.0%)            | 2 (33.3%)  | 8 (25.0%)   | 8 (25.0%)   |          |
| Assisted Living          | 0 (0.0%)        | 0 (0.0%)   | 1 (8.3%)           | 1 (7.7%)    | 0 (0.0%)          | 0 (0.0%)   | 0 (0.0%)             | 1 (16.7%)  | 1 (3.1%)    | 2 (6.3%)    |          |
| <b>Lesion Type</b>       |                 |            |                    |             |                   |            |                      |            |             |             | 0.3058   |
| Missing                  | 0 (.%)          | 0 (.%)     | 0 (.%)             | 0 (.%)      | 0 (.%)            | 0 (.%)     | 0 (.%)               | 1 (.%)     | 0 (.%)      | 1 (.%)      |          |
| Ischemic                 | 8 (100.0%)      | 8 (88.9%)  | 12 (100.0%)        | 13 (100.0%) | 6 (100.0%)        | 4 (100.0%) | 6 (100.0%)           | 5 (100.0%) | 32 (100.0%) | 30 (96.8%)  |          |
| Ischemic with Hemorrhage | 0 (0.0%)        | 1 (11.1%)  | 0 (0.0%)           | 0 (0.0%)    | 0 (0.0%)          | 0 (0.0%)   | 0 (0.0%)             | 0 (0.0%)   | 0 (0.0%)    | 1 (3.2%)    |          |

Supplemental Table 1. Baseline Demographics and Participant Characteristics

| Strata                            | Severe-Cortical |            | Severe-Subcortical |             | Moderate-Cortical |            | Moderate-Subcortical |            | Total       |             | p value* |
|-----------------------------------|-----------------|------------|--------------------|-------------|-------------------|------------|----------------------|------------|-------------|-------------|----------|
|                                   | A<br>(N=8)      | P<br>(N=9) | A<br>(N=12)        | P<br>(N=13) | A<br>(N=6)        | P<br>(N=4) | A<br>(N=6)           | P<br>(N=6) | A<br>(N=32) | P<br>(N=32) |          |
| <b>Characteristics</b>            |                 |            |                    |             |                   |            |                      |            |             |             |          |
| <b>Lesion Location</b>            |                 |            |                    |             |                   |            |                      |            |             |             | 0.4587   |
| Missing                           | 0 (.%)          | 0 (.%)     | 0 (.%)             | 0 (.%)      | 0 (.%)            | 0 (.%)     | 0 (.%)               | 1 (.%)     | 0 (.%)      | 1 (.%)      |          |
| Supratentorial Cortical           | 0 (0.0%)        | 1 (11.1%)  | 0 (0.0%)           | 1 (7.7%)    | 3 (50.0%)         | 1 (25.0%)  | 0 (0.0%)             | 0 (0.0%)   | 3 (9.4%)    | 3 (9.7%)    |          |
| Supratentorial Deep               | 0 (0.0%)        | 0 (0.0%)   | 9 (75.0%)          | 9 (69.2%)   | 0 (0.0%)          | 0 (0.0%)   | 4 (66.7%)            | 5 (100.0%) | 13 (40.6%)  | 14 (45.2%)  |          |
| Supratentorial Cortical and Deep  | 8 (100.0%)      | 8 (88.9%)  | 3 (25.0%)          | 2 (15.4%)   | 3 (50.0%)         | 2 (50.0%)  | 2 (33.3%)            | 0 (0.0%)   | 16 (50.0%)  | 12 (38.7%)  |          |
| Brainstem/Cerebellum              | 0 (0.0%)        | 0 (0.0%)   | 0 (0.0%)           | 1 (7.7%)    | 0 (0.0%)          | 1 (25.0%)  | 0 (0.0%)             | 0 (0.0%)   | 0 (0.0%)    | 2 (6.5%)    |          |
| <b>Prior Stroke</b>               |                 |            |                    |             |                   |            |                      |            |             |             | 0.9617   |
| Missing                           | 0 (.%)          | 0 (.%)     | 0 (.%)             | 1 (.%)      | 0 (.%)            | 0 (.%)     | 0 (.%)               | 0 (.%)     | 0 (.%)      | 1 (.%)      |          |
| No Prior Stroke                   | 8 (100.0%)      | 9 (100.0%) | 12 (100.0%)        | 11 (91.7%)  | 4 (66.7%)         | 2 (50.0%)  | 4 (66.7%)            | 5 (83.3%)  | 28 (87.5%)  | 27 (87.1%)  |          |
| Prior Stroke                      | 0 (0.0%)        | 0 (0.0%)   | 0 (0.0%)           | 1 (8.3%)    | 2 (33.3%)         | 2 (50.0%)  | 2 (33.3%)            | 1 (16.7%)  | 4 (12.5%)   | 4 (12.9%)   |          |
| <b>Target Deficit</b>             |                 |            |                    |             |                   |            |                      |            |             |             | 0.9548   |
| Missing                           | 0 (.%)          | 0 (.%)     | 1 (.%)             | 0 (.%)      | 0 (.%)            | 0 (.%)     | 1 (.%)               | 1 (.%)     | 2 (.%)      | 1 (.%)      |          |
| Gait                              | 7 (87.5%)       | 8 (88.9%)  | 11 (100.0%)        | 12 (92.3%)  | 3 (50.0%)         | 4 (100.0%) | 4 (80.0%)            | 2 (40.0%)  | 25 (83.3%)  | 26 (83.9%)  |          |
| Arm                               | 1 (12.5%)       | 1 (11.1%)  | 0 (0.0%)           | 1 (7.7%)    | 3 (50.0%)         | 0 (0.0%)   | 1 (20.0%)            | 3 (60.0%)  | 5 (16.7%)   | 5 (16.1%)   |          |
| <b>Oxfordshire Classification</b> |                 |            |                    |             |                   |            |                      |            |             |             | 0.5984   |
| Missing                           | 0 (.%)          | 0 (.%)     | 1 (.%)             | 0 (.%)      | 0 (.%)            | 1 (.%)     | 0 (.%)               | 0 (.%)     | 1 (.%)      | 1 (.%)      |          |
| LACI, LACS                        | 0 (0.0%)        | 0 (0.0%)   | 7 (63.6%)          | 6 (46.2%)   | 0 (0.0%)          | 1 (33.3%)  | 5 (83.3%)            | 5 (83.3%)  | 12 (38.7%)  | 12 (38.7%)  |          |
| PACI, PACS                        | 8 (100.0%)      | 9 (100.0%) | 4 (36.4%)          | 6 (46.2%)   | 6 (100.0%)        | 2 (66.7%)  | 1 (16.7%)            | 1 (16.7%)  | 19 (61.3%)  | 18 (58.1%)  |          |
| POCI, POCS                        | 0 (0.0%)        | 0 (0.0%)   | 0 (0.0%)           | 1 (7.7%)    | 0 (0.0%)          | 0 (0.0%)   | 0 (0.0%)             | 0 (0.0%)   | 0 (0.0%)    | 1 (3.2%)    |          |

\*P-value comparing distributions between *d*-Amphetamine (A) vs. Placebo (P)

**Supplemental Table 2. Mean NIH-Stroke Scale (SEM)**

| <i>Strata</i>               | <i>Baseline</i> | <i>End of Treatment</i> | <i>3-Month</i> | <i>Baseline - 3 Month Difference</i> |
|-----------------------------|-----------------|-------------------------|----------------|--------------------------------------|
| <b>Severe Cortical</b>      |                 |                         |                |                                      |
| <i>d</i> -Amphetamine       | 16.75 (1.52)    | 14.75 (1.95)            | 11.00 (2.23)   | 5.75 (1.51)                          |
| Placebo                     | 17.11 (2.38)    | 16.86 (2.85)            | 16.50 (1.85)   | 5.50 (2.18)                          |
| p-value                     | 0.961           | 0.486                   | 0.050          | 0.392                                |
| <b>Severe Subcortical</b>   |                 |                         |                |                                      |
| <i>d</i> -Amphetamine       | 12.83 (1.21)    | 10.33 (1.02)            | 9.00 (1.26)    | 3.91 (1.13)                          |
| Placebo                     | 13.31 (0.96)    | 9.08 (1.01)             | 8.67 (0.67)    | 4.58 (0.86)                          |
| p-value                     | 0.547           | 0.468                   | 0.852          | 0.475                                |
| <b>Moderate Cortical</b>    |                 |                         |                |                                      |
| <i>d</i> -Amphetamine       | 13.83 (4.45)    | 8.83 (3.07)             | 6.00 (3.02)    | 7.83 (1.94)                          |
| Placebo                     | 8.75 (1.44)     | 3.25 (1.60)             | 4.00 (2.74)    | 4.75 (3.04)                          |
| p-value                     | 0.748           | 0.238                   | 0.829          | 0.668                                |
| <b>Moderate Subcortical</b> |                 |                         |                |                                      |
| <i>d</i> -Amphetamine       | 9.67 (2.04)     | 6.67 (1.50)             | 7.33 (1.87)    | 2.33 (1.12)                          |
| Placebo                     | 10.17 (3.02)    | 7.20 (3.28)             | 6.00 (1.61)    | 5.60 (2.04)                          |
| p-value                     | 0.747           | 0.711                   | 0.462          | 0.232                                |
| <b>Total</b>                |                 |                         |                |                                      |
| <i>d</i> -Amphetamine       | 13.41 (1.11)    | 10.47 (0.98)            | 8.61 (1.00)    | 4.84 (0.75)                          |
| Placebo                     | 13.22 (1.06)    | 9.86 (1.30)             | 8.64 (1.01)    | 4.96 (0.77)                          |
| p-value                     | 0.856           | 0.476                   | 0.941          | 0.974                                |

**Supplemental Table 3. Mean Canadian Neurological Score (SEM)**

| <i>Strata</i>               | <i>Baseline</i>       | <i>End of Treatment</i> | <i>3-Month</i>        | <i>Baseline - 3 Month Difference</i> |
|-----------------------------|-----------------------|-------------------------|-----------------------|--------------------------------------|
| <b>Severe Cortical</b>      |                       |                         |                       |                                      |
| <i>d</i> -Amphetamine       | 4.50 (0.65)           | 6.13 (0.54)             | 6.81 (0.58)           | -2.31 (0.43)                         |
| Placebo                     | 5.06 (0.61)           | 5.36 (0.97)             | 5.70 (0.46)           | -0.90 (0.98)                         |
| p-value                     | 0.769                 | 0.177                   | 0.102                 | 0.262                                |
| <b>Severe Subcortical</b>   |                       |                         |                       |                                      |
| <i>d</i> -Amphetamine       | 5.25 (0.19)           | 6.42 (0.32)             | 7.05 (0.51)           | -1.73 (0.48)                         |
| Placebo                     | 5.46 (0.35)           | 7.33 (0.35)             | 8.00 (0.30)           | -2.46 (0.29)                         |
| p-value                     | 0.637                 | 0.070                   | 0.163                 | 0.335                                |
| <b>Moderate Cortical</b>    |                       |                         |                       |                                      |
| <i>d</i> -Amphetamine       | 6.42 (1.01)           | 7.92 (0.99)             | 8.42 (1.01)           | -2.00 (0.82)                         |
| Placebo                     | 6.38 (0.63)           | 8.88 (0.66)             | 10.00 (0.50)          | -3.63 (0.66)                         |
| p-value                     | 0.829                 | 0.667                   | 0.321                 | 0.159                                |
| <b>Moderate Subcortical</b> |                       |                         |                       |                                      |
| <i>d</i> -Amphetamine       | 7.75 (0.78)           | 9.08 (0.68)             | 9.58 (0.57)           | -1.83 (0.56)                         |
| Placebo                     | 7.50 (0.67)           | 8.40 (1.00)             | 8.30 (0.90)           | -0.90 (0.70)                         |
| p-value                     | 0.744                 | 0.582                   | 0.230                 | 0.408                                |
| <b>Total</b>                |                       |                         |                       |                                      |
| <i>d</i> -Amphetamine       | <i>d</i> -Amphetamine | <i>d</i> -Amphetamine   | <i>d</i> -Amphetamine | <i>d</i> -Amphetamine                |
| Placebo                     | 5.84 (0.30)           | 7.25 (0.40)             | 7.92 (0.35)           | -2.04 (0.33)                         |
| p-value                     | 0.909                 | 0.645                   | 0.748                 | 0.662                                |

**Supplemental Table 4. Mean Functional Independence Measure (SEM)**

| <i>Strata</i>               | <i>Baseline</i> | <i>End of Treatment</i> | <i>3-Month</i> | <i>Baseline - 3 Month Difference</i> |
|-----------------------------|-----------------|-------------------------|----------------|--------------------------------------|
| <b>Severe Cortical</b>      |                 |                         |                |                                      |
| <i>d</i> -Amphetamine       | 51.38 (7.21)    | 74.75 (8.70)            | 94.25 (10.21)  | -42.88 (5.56)                        |
| Placebo                     | 48.44 (5.69)    | 62.29 (9.43)            | 90.40 (8.93)   | -39.00 (4.31)                        |
| p-value                     | 0.885           | 0.487                   | 0.769          | 0.378                                |
| <b>Severe Subcortical</b>   |                 |                         |                |                                      |
| <i>d</i> -Amphetamine       | 54.83 (4.81)    | 80.17 (6.53)            | 87.73 (8.73)   | -32.73 (4.82)                        |
| Placebo                     | 54.92 (3.69)    | 80.08 (4.40)            | 93.08 (6.96)   | -37.42 (4.53)                        |
| p-value                     | 0.957           | 0.954                   | 0.805          | 0.406                                |
| <b>Moderate Cortical</b>    |                 |                         |                |                                      |
| <i>d</i> -Amphetamine       | 69.83 (7.61)    | 102.33 (7.42)           | 112.33 (6.46)  | -42.50 (4.46)                        |
| Placebo                     | 80.25 (8.02)    | 100.50 (6.46)           | 115.75 (4.27)  | -35.50 (6.25)                        |
| p-value                     | 0.392           | 0.915                   | 0.831          | 0.670                                |
| <b>Moderate Subcortical</b> |                 |                         |                |                                      |
| <i>d</i> -Amphetamine       | 70.83 (11.86)   | 94.33 (11.15)           | 109.00 (12.82) | -38.17 (12.50)                       |
| Placebo                     | 78.00 (6.28)    | 95.00 (8.37)            | 98.60 (9.34)   | -22.00 (5.92)                        |
| p-value                     | 0.631           | 0.855                   | 0.273          | 0.273                                |
| <b>Total</b>                |                 |                         |                |                                      |
| Amphetamine                 | 59.78 (3.77)    | 85.63 (4.34)            | 98.29 (5.04)   | -38.29 (3.31)                        |
| Placebo                     | 60.59 (3.41)    | 81.21 (4.17)            | 97.12 (4.26)   | -34.46 (2.84)                        |
| p-value                     | 0.819           | 0.588                   | 0.597          | 0.461                                |

**Supplemental Table 5. Mean Ambulation Distance (6-minute Walk Test, feet; SEM)**

| <i>Strata</i>               | <i>Baseline</i> | <i>End of Treatment</i> | <i>3-Month</i>  | <i>Baseline - 3 Month Difference</i> |
|-----------------------------|-----------------|-------------------------|-----------------|--------------------------------------|
| <b>Severe Cortical</b>      |                 |                         |                 |                                      |
| <i>d</i> -Amphetamine       | 93.50 (72.00)   | 283.75 (125.56)         | 385.50 (153.40) | -292.00 (86.55)                      |
| Placebo                     | 115.78 (82.13)  | 522.83 (265.91)         | 385.25 (274.89) | -312.75 (226.12)                     |
| p-value                     | 0.764           | 0.897                   | 0.396           | 0.497                                |
| <b>Severe Subcortical</b>   |                 |                         |                 |                                      |
| <i>d</i> -Amphetamine       | 19.25 (7.60)    | 236.67 (69.98)          | 360.82 (128.17) | -339.82 (122.69)                     |
| Placebo                     | 154.83 (131.57) | 184.58 (28.83)          | 314.58 (132.47) | -159.75 (47.85)                      |
| p-value                     | 0.479           | 0.840                   | 0.951           | 0.479                                |
| <b>Moderate Cortical</b>    |                 |                         |                 |                                      |
| <i>d</i> -Amphetamine       | 510.50 (233.82) | 652.17 (217.11)         | 761.50 (226.07) | -251.00 (158.63)                     |
| Placebo                     | 407.33 (258.47) | 506.00 (223.55)         | 806.50 (202.27) | -448.67 (377.31)                     |
| p-value                     | 0.796           | 0.670                   | 0.670           | 0.606                                |
| <b>Moderate Subcortical</b> |                 |                         |                 |                                      |
| <i>d</i> -Amphetamine       | 241.83 (139.90) | 456.67 (197.15)         | 837.00 (283.10) | -595.17 (207.46)                     |
| Placebo                     | 212.50 (104.42) | 335.20 (135.64)         | 402.20 (199.00) | -163.40 (111.92)                     |
| p-value                     | 0.872           | 0.647                   | 0.361           | 0.144                                |
| <b>Total</b>                |                 |                         |                 |                                      |
| <i>d</i> -Amphetamine       | 171.66 (60.00)  | 367.59 (70.32)          | 536.90 (95.21)  | -359.71 (70.07)                      |
| Placebo                     | 179.90 (65.26)  | 335.26 (73.56)          | 422.12 (93.48)  | -222.13 (64.14)                      |
| p-value                     | 0.926           | 0.732                   | 0.478           | 0.156                                |

**Supplemental Table 6. Mean Ambulation Speed (6-minute Walk Test, feet/minute; SEM)**

| <i>Strata</i>               | <i>Baseline</i> | <i>End of Treatment</i> | <i>3-Month</i> | <i>Baseline - 3 Month Difference</i> |
|-----------------------------|-----------------|-------------------------|----------------|--------------------------------------|
| <b>Severe Cortical</b>      |                 |                         |                |                                      |
| <i>d</i> -Amphetamine       | 19.75 (12.29)   | 34.13 (8.43)            | 66.13 (26.02)  | -46.38 (15.04)                       |
| Placebo                     | 30.89 (21.03)   | 82.67 (41.35)           | 47.75 (22.29)  | -28.25 (13.73)                       |
| p-value                     | 0.727           | 0.699                   | 0.610          | 0.552                                |
| <b>Severe Subcortical</b>   |                 |                         |                |                                      |
| <i>d</i> -Amphetamine       | 12.67 (6.88)    | 64.58 (20.48)           | 68.91 (20.98)  | -55.09 (16.86)                       |
| Placebo                     | 30.58 (19.53)   | 52.92 (19.03)           | 53.50 (21.68)  | -22.92 (7.19)                        |
| p-value                     | 0.445           | 0.954                   | 0.758          | 0.310                                |
| <b>Moderate Cortical</b>    |                 |                         |                |                                      |
| <i>d</i> -Amphetamine       | 65.75 (34.08)   | 115.83 (33.04)          | 129.83 (31.83) | -32.00 (7.45)                        |
| Placebo                     | 54.67 (25.98)   | 96.50 (36.59)           | 144.75 (32.18) | -100.33 (48.83)                      |
| p-value                     | 1.000           | 0.394                   | 0.522          | 0.289                                |
| <b>Moderate Subcortical</b> |                 |                         |                |                                      |
| <i>d</i> -Amphetamine       | 172.67 (129.19) | 100.67 (36.64)          | 137.83 (47.82) | 34.83 (120.77)                       |
| Placebo                     | 60.83 (18.49)   | 71.20 (19.32)           | 67.20 (32.33)  | -11.60 (19.54)                       |
| p-value                     | 0.936           | 0.715                   | 0.273          | 0.273                                |
| <b>Total</b>                |                 |                         |                |                                      |
| <i>d</i> -Amphetamine       | 53.63 (27.21)   | 73.34 (12.74)           | 93.32 (15.30)  | -30.90 (25.22)                       |
| Placebo                     | 39.13 (10.80)   | 69.37 (13.60)           | 69.92 (14.66)  | -31.13 (9.34)                        |
| p-value                     | 0.788           | 0.879                   | 0.335          | 0.214                                |



**Supplemental Table 7. Mean Action Research Arm Test (SEM)**

| <i>Strata</i>               | <i>Baseline</i> | <i>End of Treatment</i> | <i>3-Month</i> | <i>Baseline - 3 Month Difference</i> |
|-----------------------------|-----------------|-------------------------|----------------|--------------------------------------|
| <b>Severe Cortical</b>      |                 |                         |                |                                      |
| <i>d</i> -Amphetamine       | 42.88 (9.36)    | 53.38 (8.88)            | 62.14 (8.45)   | -13.14 (9.01)                        |
| Placebo                     | 57.88 (3.54)    | 65.00 (8.00)            | 57.75 (0.75)   | -4.50 (3.57)                         |
| p-value                     | 0.523           | 0.299                   | 0.679          | 0.921                                |
| <b>Severe Subcortical</b>   |                 |                         |                |                                      |
| <i>d</i> -Amphetamine       | 57.25 (0.25)    | 58.67 (1.10)            | 59.55 (2.16)   | -2.27 (1.89)                         |
| Placebo                     | 58.85 (1.97)    | 67.75 (5.14)            | 76.67 (5.78)   | -17.33 (5.42)                        |
| p-value                     | 0.726           | 0.271                   | 0.022          | 0.011                                |
| <b>Moderate Cortical</b>    |                 |                         |                |                                      |
| <i>d</i> -Amphetamine       | 77.00 (10.39)   | 77.83 (10.00)           | 81.00 (12.04)  | -9.40 (6.81)                         |
| Placebo                     | 76.00 (19.00)   | 90.75 (12.87)           | 105.25 (8.75)  | -26.33 (16.60)                       |
| p-value                     | 0.684           | 0.334                   | 0.095          | 0.341                                |
| <b>Moderate Subcortical</b> |                 |                         |                |                                      |
| <i>d</i> -Amphetamine       | 84.50 (9.39)    | 91.50 (12.91)           | 92.17 (11.44)  | -7.67 (4.92)                         |
| Placebo                     | 73.40 (11.25)   | 74.00 (10.93)           | 74.00 (11.26)  | -0.60 (0.40)                         |
| p-value                     | 0.444           | 0.714                   | 0.389          | 0.370                                |
| <b>Total</b>                |                 |                         |                |                                      |
| <i>d</i> -Amphetamine       | 62.47 (4.30)    | 67.09 (4.40)            | 70.62 (4.37)   | -7.24 (2.72)                         |
| Placebo                     | 62.86 (3.04)    | 71.46 (4.07)            | 77.68 (4.58)   | -12.83 (3.69)                        |
| p-value                     | 0.375           | 0.271                   | 0.129          | 0.082                                |

**Supplemental Table 8. Mean Mini Mental State Examination (SEM)**

| <i>Strata</i>               | <i>Baseline</i> | <i>End of Treatment</i> | <i>3-Month</i> | <i>Baseline - 3 Month Difference</i> |
|-----------------------------|-----------------|-------------------------|----------------|--------------------------------------|
| <b>Severe Cortical</b>      |                 |                         |                |                                      |
| <i>d</i> -Amphetamine       | 14.88 (4.50)    | 19.00 (3.91)            | 21.38 (3.51)   | -6.50 (2.73)                         |
| Placebo                     | 17.67 (3.77)    | 14.83 (5.15)            | 11.33 (7.31)   | -2.00 (3.61)                         |
| p-value                     | 0.884           | 0.398                   | 0.182          | 0.409                                |
| <b>Severe Subcortical</b>   |                 |                         |                |                                      |
| <i>d</i> -Amphetamine       | 22.50 (1.28)    | 25.00 (1.40)            | 24.36 (1.71)   | -1.82 (1.11)                         |
| Placebo                     | 21.54 (2.03)    | 23.67 (1.52)            | 23.08 (1.67)   | -1.83 (1.56)                         |
| p-value                     | 0.870           | 0.601                   | 0.557          | 0.926                                |
| <b>Moderate Cortical</b>    |                 |                         |                |                                      |
| <i>d</i> -Amphetamine       | 12.50 (5.64)    | 18.17 (4.94)            | 21.83 (2.36)   | -9.33 (3.81)                         |
| Placebo                     | 27.75 (1.03)    | 28.50 (0.96)            | 28.25 (1.03)   | -0.50 (2.06)                         |
| p-value                     | 0.030           | 0.194                   | 0.051          | 0.198                                |
| <b>Moderate Subcortical</b> |                 |                         |                |                                      |
| <i>d</i> -Amphetamine       | 19.83 (4.56)    | 23.33 (2.19)            | 23.83 (1.90)   | -4.00 (3.68)                         |
| Placebo                     | 23.50 (0.92)    | 26.25 (1.89)            | 23.60 (1.40)   | -0.40 (1.91)                         |
| p-value                     | 0.747           | 0.334                   | 1.000          | 0.646                                |
| <b>Total</b>                |                 |                         |                |                                      |
| <i>d</i> -Amphetamine       | 18.22 (1.86)    | 21.91 (1.51)            | 23.00 (1.20)   | -4.90 (1.33)                         |
| Placebo                     | 21.59 (1.43)    | 22.77 (1.63)            | 22.58 (1.51)   | -1.33 (0.98)                         |
| p-value                     | 0.270           | 0.621                   | 0.912          | 0.119                                |

**Supplemental Table 9. Mean Beck Depression Index (SEM)**

| <i>Strata</i>               | <i>Baseline</i> | <i>End of Treatment</i> | <i>3-Month</i> | <i>Baseline - 3 Month Difference</i> |
|-----------------------------|-----------------|-------------------------|----------------|--------------------------------------|
| <b>Severe Cortical</b>      |                 |                         |                |                                      |
| <i>d</i> -Amphetamine       | 9.86 (2.25)     | 7.00 (1.38)             | 10.50 (2.04)   | -0.43 (1.56)                         |
| Placebo                     | 17.78 (3.33)    | 11.60 (1.81)            | 6.50 (2.75)    | 12.00 (5.28)                         |
| p-value                     | 0.071           | 0.078                   | 0.308          | 0.037                                |
| <b>Severe Subcortical</b>   |                 |                         |                |                                      |
| <i>d</i> -Amphetamine       | 12.45 (1.61)    | 6.67 (1.05)             | 9.45 (2.29)    | 3.70 (2.08)                          |
| Placebo                     | 11.00 (2.94)    | 9.45 (1.94)             | 10.91 (2.63)   | -1.90 (1.78)                         |
| p-value                     | 0.323           | 0.286                   | 0.742          | 0.053                                |
| <b>Moderate Cortical</b>    |                 |                         |                |                                      |
| <i>d</i> -Amphetamine       | 11.33 (2.46)    | 9.40 (1.60)             | 7.50 (1.59)    | 3.83 (1.92)                          |
| Placebo                     | 7.25 (2.29)     | 4.75 (1.18)             | 5.00 (1.41)    | 2.25 (2.87)                          |
| p-value                     | 0.336           | 0.048                   | 0.279          | 0.520                                |
| <b>Moderate Subcortical</b> |                 |                         |                |                                      |
| <i>d</i> -Amphetamine       | 16.17 (3.82)    | 11.60 (3.78)            | 11.00 (3.75)   | 5.17 (3.55)                          |
| Placebo                     | 6.83 (1.35)     | 4.60 (1.63)             | 9.00 (2.10)    | -1.00 (2.17)                         |
| p-value                     | 0.076           | 0.209                   | 0.709          | 0.272                                |
| <b>Total</b>                |                 |                         |                |                                      |
| <i>d</i> -Amphetamine       | 12.37 (1.20)    | 8.19 (0.94)             | 9.65 (1.21)    | 3.03 (1.16)                          |
| Placebo                     | 11.68 (1.68)    | 8.16 (1.11)             | 8.79 (1.41)    | 1.43 (1.66)                          |
| p-value                     | 0.520           | 0.956                   | 0.507          | 0.145                                |

**Supplemental Table 10. Mean Stroke Impact Scale (SEM)**

| <i>Strata</i>               | <i>Baseline</i> | <i>3-Month</i> | <i>Baseline - 3 Month Difference</i> |
|-----------------------------|-----------------|----------------|--------------------------------------|
| <b>Severe Cortical</b>      |                 |                |                                      |
| <i>d</i> -Amphetamine       | 31.71 (5.88)    | 48.13 (6.29)   | -14.29 (3.60)                        |
| Placebo                     | 35.50 (5.11)    | 50.00 (5.26)   | -13.40 (11.03)                       |
| p-value                     | 0.524           | 0.661          | 0.871                                |
| <b>Severe Subcortical</b>   |                 |                |                                      |
| <i>d</i> -Amphetamine       | 30.82 (1.86)    | 49.60 (4.83)   | -20.67 (4.96)                        |
| Placebo                     | 29.08 (2.33)    | 52.09 (4.18)   | -21.70 (4.64)                        |
| p-value                     | 0.441           | 0.672          | 1.000                                |
| <b>Moderate Cortical</b>    |                 |                |                                      |
| <i>d</i> -Amphetamine       | 52.00 (5.28)    | 67.00 (4.46)   | -15.00 (2.27)                        |
| Placebo                     | 43.25 (7.23)    | 69.50 (0.87)   | -26.25 (7.06)                        |
| p-value                     | 0.281           | 0.915          | 0.201                                |
| <b>Moderate Subcortical</b> |                 |                |                                      |
| <i>d</i> -Amphetamine       | 34.33 (4.29)    | 55.83 (8.13)   | -21.50 (5.74)                        |
| Placebo                     | 43.50 (6.40)    | 47.00 (5.98)   | -6.60 (5.39)                         |
| p-value                     | 0.336           | 0.361          | 0.200                                |
| <b>Total</b>                |                 |                |                                      |
| <i>d</i> -Amphetamine       | 35.97 (2.44)    | 53.93 (3.11)   | -18.04 (2.23)                        |
| Placebo                     | 35.57 (2.43)    | 53.44 (2.74)   | -17.58 (3.49)                        |
| p-value                     | 0.784           | 0.892          | 0.861                                |
